# Supplementary material
Source: Springer Nature journal article supplement (https://www.springermedizin.de/resource/supplementary/12885_2009_1525_MOESM5_ESM.pdf/9472236)

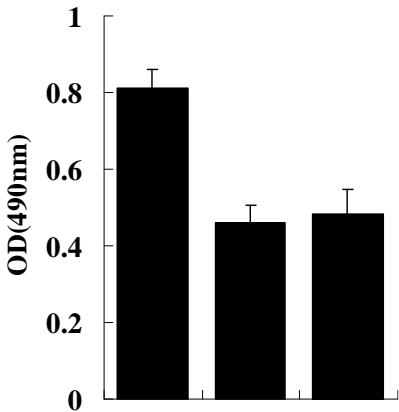

**pcDNA3.1-VNTR**

**pcDNA3.1**

**PBS**

Supplement: MOESM5 [file 9472236]
